# Supplementary material
Source: Springer Nature journal article supplement (https://www.springermedizin.de/resource/supplementary/12985_2010_828_MOESM4_ESM.pdf/9609280)

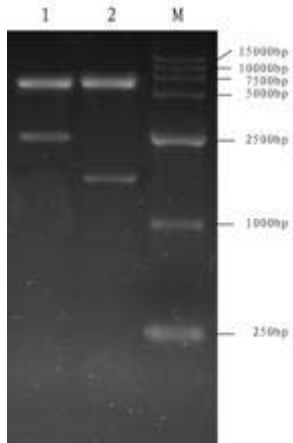

A

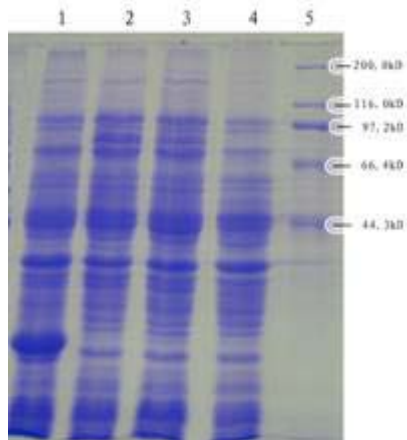

B

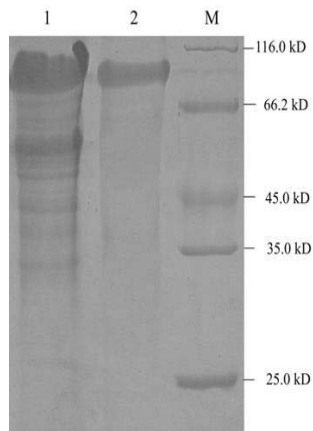

C

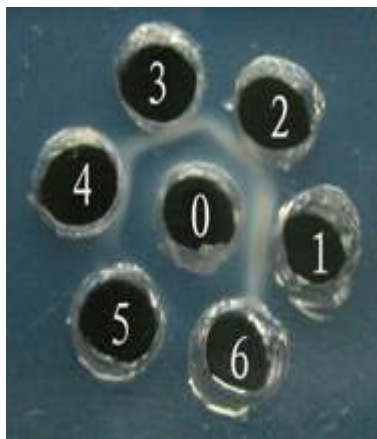

D

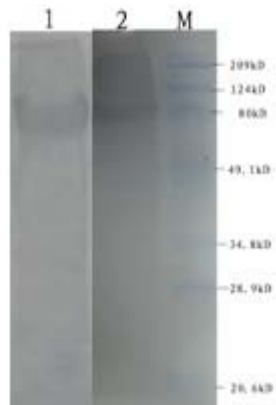

E

Supplement: MOESM4 [file 9609280]
